# Supplementary material for: Identification and Evaluation of Sugarcane Cultivars for Antixenosis Resistance to the Leafhopper <em>Yamatotettix flavovittatus</em> Matsumura (Hemiptera: Cicadellidae)
Source: Preprints.org preprint supplement (doi:10.20944/preprints202405.1240.v1), 2024-05-20
Supplement: Supplementary file 1 [file supplementary]

**Supplements**


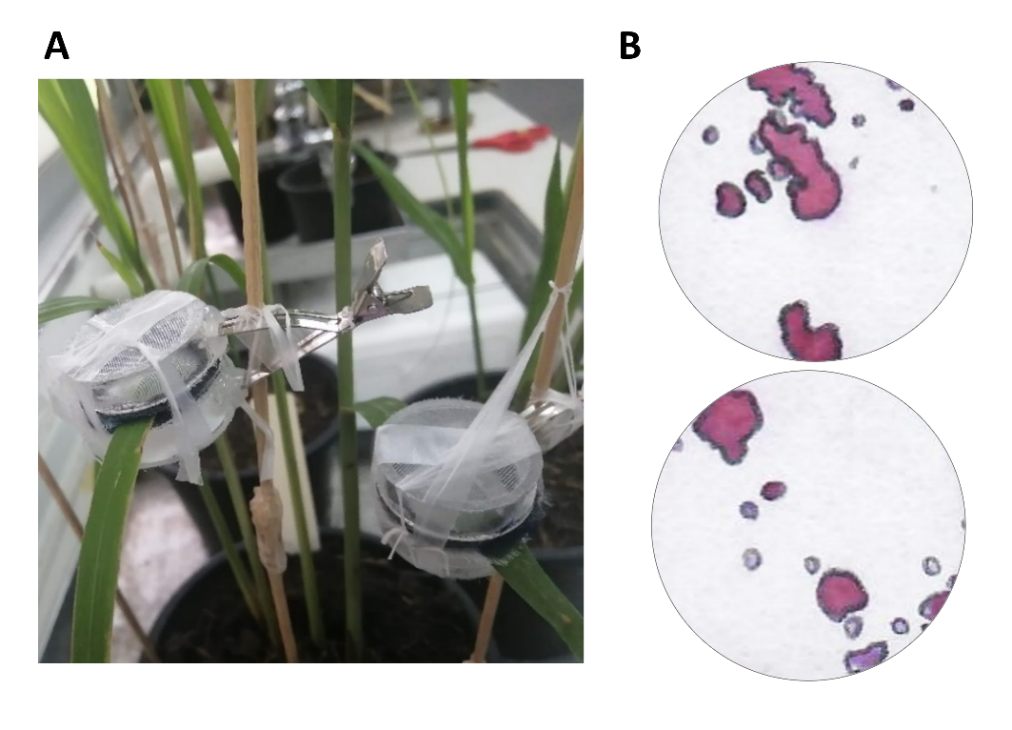


**Figure S1.** (A) Collection of leafhopper *Y. flavovittatus* honeydew on Whatman filter paper that was placed at the bottom of insect cages, and (B) representative staining of honeydew spots on filter paper with 0.1% ninhydrin.


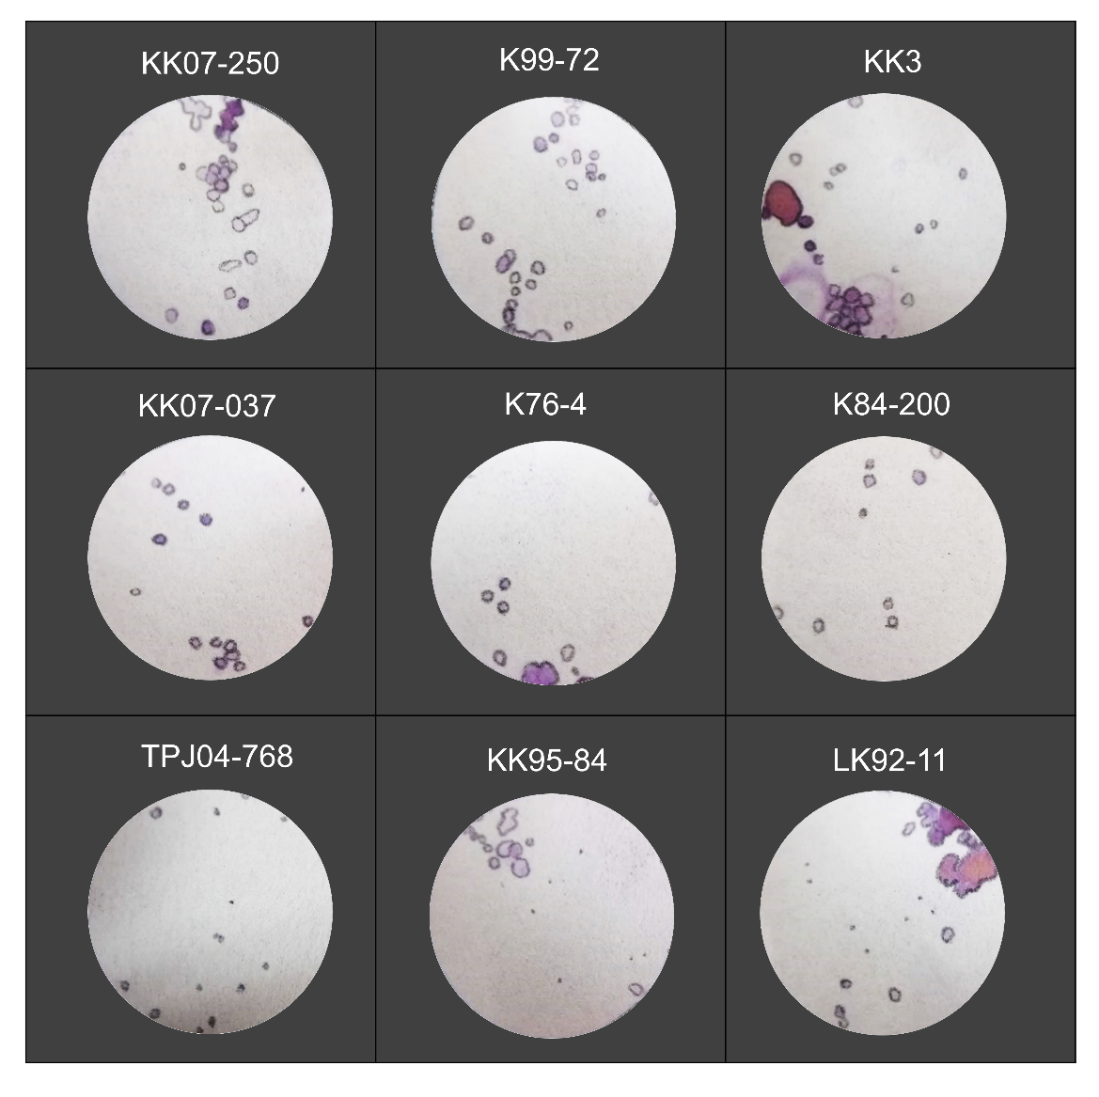


**Figure S2.** Honeydew excretion on filter paper. The size of the honeydew area and the intensity of the honeydew color correspond to the leafhopper *Y. flavovittatus* feeding activity.

**Table S1.** List of parameters used for cluster analysis and their significance levels from test statistics using Mann–Whitney U-test and Tukey–Kramer (SAS software).

| **No.** | **Parameters** | **Significance level** |
| --- | --- | --- |
| 1 | Average settling behavior of leafhopper 24 h [Settling 24 h] | < 0.001 |
| 2 | Average settling behavior of leafhopper 48 h [Settling 48 h] | < 0.001 |
| 3 | Average settling behavior of leafhopper 72 h [Settling 72 h] | < 0.001 |
| 4 | Average settling behavior of leafhopper 96 h [Settling 96 h] | < 0.001 |
| 5 | Average honeydew production area 5 h [Honeydew 5 h] | < 0.001 |
| 6 | Average honeydew production area 10 h [Honeydew 10 h] | < 0.001 |
| 7 | Percentage of waveform Np duration [WDEI NP] | 0.002 |
| 8 | Percentage of waveform Yf1 duration [WDEI Yf1] | 0.415 |
| 9 | Percentage of waveform Yf2 duration [WDEI Yf2] | 0.045 |
| 10 | Percentage of waveform Yf3 duration [WDEI Yf3] | 0.016 |
| 11 | Percentage of waveform Yf4 duration [WDEI Yf4] | 0.034 |
| 12 | Percentage of waveform Yf5 duration [WDEI Yf5] | 0.203 |
| 13 | Percentage of waveform Np frequency [NEWI NP] | 0.003 |
| 14 | Percentage of waveform Yf1 frequency [NEWI Yf1] | 0.020 |
| 15 | Percentage of waveform Yf2 frequency [NEWI Yf2] | 0.031 |
| 16 | Percentage of waveform Yf3 frequency [NEWI Yf3] | 0.161 |
| 17 | Percentage of waveform Yf4 frequency [NEWI Yf4] | 0.009 |
| 18 | Percentage of waveform Yf5 frequency [NEWI Yf5] | 0.705 |
| 19 | No. Silica cells per 100 µm [No. Si cells] | < 0.001 |
| 20 | No. Silica row per 100 µm [No. Si rows] | < 0.001 |
| 21 | Trichome density per 100 µm [Trichome density] | < 0.001 |
